# Supplementary material for: Electronic structure of the members of the electron transfer series [NiL]z (z = 3+, 2+, 1+, 0) and [NiL(X)]n (X = Cl, CO, P(OCH3)3) species containing a tetradentate, redox-noninnocent, Schiff base macrocyclic ligand L: an experimental and density functional theoretical study
Source: Royal Society of Chemistry journal article supplement (doi:10.1039/b916682c), 2010-01-01
Supplement: b916682c.pdf [file b916682c.pdf]

**Table S1.** List of spin densities of all compounds

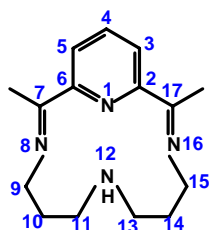

| Compound                                                     | Mulliken Spin density | Loewdin Spin density |
|--------------------------------------------------------------|-----------------------|----------------------|
| [Ni <sup>II</sup> (L <sup>Red</sup> )] <sup>0</sup><br>S = 1 | 0 Ni: 0.134364        | 0 Ni: 0.155036       |
|                                                              | 1 N : 0.184606        | 1 N : 0.176882       |
|                                                              | 2 C : 0.114864        | 2 C : 0.117872       |
|                                                              | 3 C : 0.201824        | 3 C : 0.191367       |
|                                                              | 4 C : 0.088066        | 4 C : 0.090582       |
|                                                              | 5 C : 0.173666        | 5 C : 0.175159       |
|                                                              | 6 C : 0.105709        | 6 C : 0.111384       |
|                                                              | 7 C : 0.302283        | 7 C : 0.270401       |
|                                                              | 8 N : 0.227085        | 8 N : 0.213720       |
|                                                              | 9 C : 0.009653        | 9 C : 0.003567       |
|                                                              | 10 C : 0.002576       | 10 C : 0.002668      |
|                                                              | 11 C : 0.000657       | 11 C : 0.001722      |
|                                                              | 12 N : 0.006561       | 12 N : 0.006600      |
|                                                              | 13 C : 0.000088       | 13 C : 0.001685      |
|                                                              | 14 C : 0.002165       | 14 C : 0.002424      |
|                                                              | 15 C : 0.016108       | 15 C : 0.013904      |
|                                                              | 16 N : 0.151932       | 16 N : 0.151393      |
|                                                              | 17 C : 0.170239       | 17 C : 0.191895      |
|                                                              | 18 C : 0.020217       | 18 C : -0.001452     |
|                                                              | 19 C : 0.030797       | 19 C : 0.017407      |
|                                                              | 20 H : 0.002463       | 20 H : 0.001070      |
|                                                              | 21 H : 0.000048       | 21 H : 0.000022      |
|                                                              | 22 H : 0.002696       | 22 H : 0.001226      |
|                                                              | 23 H : 0.004671       | 23 H : 0.005229      |
|                                                              | 24 H : 0.025537       | 24 H : 0.018868      |
|                                                              | 25 H : 0.001450       | 25 H : 0.000725      |
|                                                              | 26 H : 0.000333       | 26 H : 0.000131      |
|                                                              | 27 H : 0.001065       | 27 H : 0.000477      |
|                                                              | 28 H : 0.001673       | 28 H : 0.001256      |
|                                                              | 29 H : 0.001844       | 29 H : 0.001475      |
|                                                              | 30 H : 0.000658       | 30 H : 0.000276      |
|                                                              | 31 H : 0.001234       | 31 H : 0.000722      |
|                                                              | 32 H : 0.002592       | 32 H : 0.001350      |
|                                                              | 33 H : 0.017436       | 33 H : 0.015005      |
|                                                              | 34 H : 0.002536       | 34 H : 0.004209      |
|                                                              | 35 H : 0.019179       | 35 H : 0.017311      |
|                                                              | 36 H : 0.000836       | 36 H : 0.000412      |
|                                                              | 37 H : 0.015066       | 37 H : 0.014101      |
|                                                              | 38 H : 0.010942       | 38 H : 0.012927      |
|                                                              | 39 H : 0.007898       | 39 H : 0.010073      |
|                                                              | 40 H : -0.000564      | 40 H : -0.000136     |
| 41 H : 0.001789                                              | 41 H : 0.001192       |                      |

| Compound                                                     | Mulliken Spin density | Loewdin Spin density |
|--------------------------------------------------------------|-----------------------|----------------------|
| [Ni <sup>II</sup> (L <sup>Red</sup> )] <sup>0</sup><br>S = 0 | 0 Ni : -0.000016      | 0 Ni : -0.000016     |
|                                                              | 1 N : -0.000003       | 1 N : -0.000004      |
|                                                              | 2 C : -0.051472       | 2 C : -0.051176      |
|                                                              | 3 C : 0.049547        | 3 C : 0.040932       |
|                                                              | 4 C : -0.000020       | 4 C : -0.000013      |
|                                                              | 5 C : -0.049490       | 5 C : -0.040890      |
|                                                              | 6 C : 0.051445        | 6 C : 0.051161       |
|                                                              | 7 C : 0.204268        | 7 C : 0.174357       |
|                                                              | 8 N : 0.139264        | 8 N : 0.128261       |
|                                                              | 9 C : -0.011031       | 9 C : -0.000974      |
|                                                              | 10 C : 0.001588       | 10 C : 0.001392      |
|                                                              | 11 C : 0.001074       | 11 C : 0.000276      |
|                                                              | 12 N : 0.000001       | 12 N : 0.000001      |
|                                                              | 13 C : -0.001074      | 13 C : -0.000276     |
|                                                              | 14 C : -0.001588      | 14 C : -0.001392     |
|                                                              | 15 C : 0.011031       | 15 C : 0.000975      |
|                                                              | 16 N : -0.139266      | 16 N : -0.128262     |
|                                                              | 17 C : -0.204257      | 17 C : -0.174349     |
|                                                              | 18 C : -0.023069      | 18 C : -0.005403     |
|                                                              | 19 C : 0.023069       | 19 C : 0.005402      |
|                                                              | 20 H : -0.002646      | 20 H : -0.001181     |
|                                                              | 21 H : 0.000001       | 21 H : 0.000000      |
|                                                              | 22 H : 0.002643       | 22 H : 0.001180      |
|                                                              | 23 H : 0.002851       | 23 H : 0.002913      |
|                                                              | 24 H : 0.014455       | 24 H : 0.010560      |
|                                                              | 25 H : 0.000573       | 25 H : 0.000269      |
|                                                              | 26 H : -0.000082      | 26 H : -0.000085     |
|                                                              | 27 H : -0.000382      | 27 H : -0.000109     |
|                                                              | 28 H : 0.000148       | 28 H : 0.000259      |
|                                                              | 29 H : -0.000149      | 29 H : -0.000259     |
|                                                              | 30 H : 0.000382       | 30 H : 0.000109      |
|                                                              | 31 H : 0.000082       | 31 H : 0.000085      |
|                                                              | 32 H : -0.000573      | 32 H : -0.000269     |
|                                                              | 33 H : -0.014453      | 33 H : -0.010560     |
|                                                              | 34 H : -0.002851      | 34 H : -0.002913     |
|                                                              | 35 H : 0.012853       | 35 H : 0.010986      |
|                                                              | 36 H : 0.000680       | 36 H : 0.000275      |
|                                                              | 37 H : 0.010455       | 37 H : 0.009237      |
|                                                              | 38 H : -0.012853      | 38 H : -0.010987     |
|                                                              | 39 H : -0.010454      | 39 H : -0.009236     |
|                                                              | 40 H : -0.000680      | 40 H : -0.000275     |
|                                                              | 41 H : -0.000000      | 41 H : -0.000000     |

| Compound                                                      | Mulliken Spin density | Loewdin Spin density |
|---------------------------------------------------------------|-----------------------|----------------------|
| [Ni <sup>II</sup> (L <sup>•</sup> )] <sup>1+</sup><br>S = 1/2 | 0 Ni : 0.061033       | 0 Ni : 0.095808      |
|                                                               | 1 N : 0.248755        | 1 N : 0.223462       |
|                                                               | 2 C : 0.095377        | 2 C : 0.085977       |
|                                                               | 3 C : -0.083518       | 3 C : -0.051357      |
|                                                               | 4 C : 0.162267        | 4 C : 0.126112       |
|                                                               | 5 C : -0.083385       | 5 C : -0.051245      |
|                                                               | 6 C : 0.095134        | 6 C : 0.085762       |
|                                                               | 7 C : 0.147768        | 7 C : 0.131843       |
|                                                               | 8 N : 0.097982        | 8 N : 0.088193       |
|                                                               | 9 C : -0.007581       | 9 C : -0.001244      |
|                                                               | 10 C : 0.001719       | 10 C : 0.001048      |
|                                                               | 11 C : 0.000583       | 11 C : 0.001013      |
|                                                               | 12 N : -0.002517      | 12 N : -0.000246     |
|                                                               | 13 C : 0.000584       | 13 C : 0.001014      |
|                                                               | 14 C : 0.001725       | 14 C : 0.001051      |
|                                                               | 15 C : -0.007608      | 15 C : -0.001245     |
|                                                               | 16 N : 0.098392       | 16 N : 0.088553      |
|                                                               | 17 C : 0.148205       | 17 C : 0.132235      |
|                                                               | 18 C : -0.017552      | 18 C : -0.003908     |
|                                                               | 19 C : -0.017608      | 19 C : -0.003922     |
|                                                               | 20 H : 0.003160       | 20 H : 0.001390      |
|                                                               | 21 H : -0.008174      | 21 H : -0.003973     |
|                                                               | 22 H : 0.003153       | 22 H : 0.001387      |
|                                                               | 23 H : 0.000929       | 23 H : 0.001090      |
|                                                               | 24 H : 0.008323       | 24 H : 0.006502      |
|                                                               | 25 H : 0.000142       | 25 H : 0.000076      |
|                                                               | 26 H : 0.000009       | 26 H : 0.000011      |
|                                                               | 27 H : -0.000140      | 27 H : -0.000131     |
|                                                               | 28 H : 0.001506       | 28 H : 0.001016      |
|                                                               | 29 H : 0.001506       | 29 H : 0.001016      |
|                                                               | 30 H : -0.000142      | 30 H : -0.000132     |
|                                                               | 31 H : 0.000009       | 31 H : 0.000010      |
|                                                               | 32 H : 0.000143       | 32 H : 0.000076      |
|                                                               | 33 H : 0.008360       | 33 H : 0.006528      |
|                                                               | 34 H : 0.000925       | 34 H : 0.001088      |
|                                                               | 35 H : 0.011201       | 35 H : 0.009730      |
|                                                               | 36 H : 0.000429       | 36 H : 0.000171      |
|                                                               | 37 H : 0.008490       | 37 H : 0.007441      |
|                                                               | 38 H : 0.011216       | 38 H : 0.009740      |
|                                                               | 39 H : 0.008543       | 39 H : 0.007487      |
|                                                               | 40 H : 0.000426       | 40 H : 0.000167      |
| 41 H : 0.000232                                               | 41 H : 0.000406       |                      |

| Compound                                                                                  | Mulliken Spin density | Loewdin Spin density |
|-------------------------------------------------------------------------------------------|-----------------------|----------------------|
| <i>trans</i> -[Ni <sup>II</sup> (L <sup>ox</sup> )Cl <sub>2</sub> ] <sup>0</sup><br>S = 1 | 0 Ni: 1.567451        | 0 Ni: 1.579221       |
|                                                                                           | 1 N : 0.065692        | 1 N : 0.062758       |
|                                                                                           | 2 C : -0.001326       | 2 C : -0.001499      |
|                                                                                           | 3 C : 0.000471        | 3 C : 0.000556       |
|                                                                                           | 4 C : -0.006816       | 4 C : -0.005558      |
|                                                                                           | 5 C : 0.000519        | 5 C : 0.000549       |
|                                                                                           | 6 C : -0.000601       | 6 C : -0.001177      |
|                                                                                           | 7 C : -0.011708       | 7 C : -0.008135      |
|                                                                                           | 8 N : 0.063990        | 8 N : 0.062976       |
|                                                                                           | 9 C : -0.002481       | 9 C : -0.001848      |
|                                                                                           | 10 C : 0.002142       | 10 C : 0.001884      |
|                                                                                           | 11 C : -0.003492      | 11 C : -0.001464     |
|                                                                                           | 12 N : 0.067724       | 12 N : 0.059674      |
|                                                                                           | 13 C : -0.003610      | 13 C : -0.001978     |
|                                                                                           | 14 C : 0.003635       | 14 C : 0.003198      |
|                                                                                           | 15 C : -0.002413      | 15 C : -0.001623     |
|                                                                                           | 16 N : 0.064410       | 16 N : 0.061946      |
|                                                                                           | 17 C : -0.012694      | 17 C : -0.008837     |
|                                                                                           | 18 Cl: 0.094907       | 18 Cl: 0.092673      |
|                                                                                           | 19 Cl: 0.094766       | 19 Cl: 0.091650      |
|                                                                                           | 20 C : 0.003656       | 20 C : 0.002811      |
|                                                                                           | 21 C : 0.003703       | 21 C : 0.002975      |
|                                                                                           | 22 H : 0.001238       | 22 H : 0.000897      |
|                                                                                           | 23 H : 0.000476       | 23 H : 0.000232      |
|                                                                                           | 24 H : 0.001295       | 24 H : 0.000929      |
|                                                                                           | 25 H : 0.003550       | 25 H : 0.002494      |
|                                                                                           | 26 H : 0.000585       | 26 H : 0.000481      |
|                                                                                           | 27 H : -0.000379      | 27 H : -0.000269     |
|                                                                                           | 28 H : -0.000316      | 28 H : -0.000191     |
|                                                                                           | 29 H : -0.000043      | 29 H : 0.000062      |
|                                                                                           | 30 H : 0.003064       | 30 H : 0.002542      |
|                                                                                           | 31 H : 0.000125       | 31 H : 0.000137      |
|                                                                                           | 32 H : -0.000379      | 32 H : -0.000261     |
|                                                                                           | 33 H : -0.000541      | 33 H : -0.000352     |
|                                                                                           | 34 H : 0.000695       | 34 H : 0.000597      |
|                                                                                           | 35 H : 0.003362       | 35 H : 0.002507      |
|                                                                                           | 36 H : -0.002999      | 36 H : -0.002087     |
|                                                                                           | 37 H : 0.003657       | 37 H : 0.002844      |
|                                                                                           | 38 H : -0.000573      | 38 H : -0.000598     |
|                                                                                           | 39 H : 0.000197       | 39 H : 0.000286      |
|                                                                                           | 40 H : -0.000267      | 40 H : -0.000352     |
|                                                                                           | 41 H : -0.000523      | 41 H : -0.000401     |
|                                                                                           | 42 H : 0.000856       | 42 H : 0.000609      |
|                                                                                           | 43 H : -0.001004      | 43 H : -0.000859     |

| Compound                                                        | Mulliken Spin density | Loewdin Spin density |
|-----------------------------------------------------------------|-----------------------|----------------------|
| [Ni <sup>III</sup> (L <sup>ox</sup> )] <sup>3+</sup><br>S = 1/2 | 0 Ni : 0.807177       | 0 Ni : 0.792016      |
|                                                                 | 1 N : -0.018703       | 1 N : -0.013251      |
|                                                                 | 2 C : 0.009714        | 2 C : 0.010627       |
|                                                                 | 3 C : 0.071573        | 3 C : 0.061695       |
|                                                                 | 4 C : -0.035032       | 4 C : -0.021055      |
|                                                                 | 5 C : 0.071571        | 5 C : 0.061693       |
|                                                                 | 6 C : 0.009718        | 6 C : 0.010628       |
|                                                                 | 7 C : 0.023658        | 7 C : 0.019798       |
|                                                                 | 8 N : 0.039746        | 8 N : 0.045308       |
|                                                                 | 9 C : -0.005089       | 9 C : -0.000972      |
|                                                                 | 10 C : -0.000767      | 10 C : -0.000452     |
|                                                                 | 11 C : -0.000841      | 11 C : -0.002047     |
|                                                                 | 12 N : -0.042148      | 12 N : -0.037905     |
|                                                                 | 13 C : -0.000841      | 13 C : -0.002047     |
|                                                                 | 14 C : -0.000765      | 14 C : -0.000450     |
|                                                                 | 15 C : -0.005090      | 15 C : -0.000971     |
|                                                                 | 16 N : 0.039762       | 16 N : 0.045323      |
|                                                                 | 17 C : 0.023662       | 17 C : 0.019801      |
|                                                                 | 18 C : 0.000198       | 18 C : 0.000675      |
|                                                                 | 19 C : 0.000199       | 19 C : 0.000676      |
|                                                                 | 20 H : -0.003395      | 20 H : -0.001944     |
|                                                                 | 21 H : 0.001098       | 21 H : 0.000551      |
|                                                                 | 22 H : -0.003396      | 22 H : -0.001944     |
|                                                                 | 23 H : 0.001681       | 23 H : 0.001173      |
|                                                                 | 24 H : 0.008531       | 24 H : 0.006691      |
|                                                                 | 25 H : 0.001095       | 25 H : 0.000680      |
|                                                                 | 26 H : -0.000113      | 26 H : -0.000098     |
|                                                                 | 27 H : -0.000605      | 27 H : -0.000557     |
|                                                                 | 28 H : -0.005886      | 28 H : -0.004758     |
|                                                                 | 29 H : -0.005886      | 29 H : -0.004758     |
|                                                                 | 30 H : -0.000605      | 30 H : -0.000557     |
|                                                                 | 31 H : -0.000113      | 31 H : -0.000098     |
|                                                                 | 32 H : 0.001096       | 32 H : 0.000681      |
|                                                                 | 33 H : 0.008532       | 33 H : 0.006692      |
|                                                                 | 34 H : 0.001682       | 34 H : 0.001174      |
|                                                                 | 35 H : 0.002121       | 35 H : 0.001959      |
|                                                                 | 36 H : -0.000520      | 36 H : -0.000361     |
|                                                                 | 37 H : 0.002581       | 37 H : 0.002329      |
|                                                                 | 38 H : 0.002118       | 38 H : 0.001956      |
|                                                                 | 39 H : 0.002586       | 39 H : 0.002332      |
|                                                                 | 40 H : -0.000520      | 40 H : -0.000361     |
|                                                                 | 41 H : 0.000217       | 41 H : 0.000123      |

| Compound                                                                                      | Mulliken Spin density | Loewdin Spin density |
|-----------------------------------------------------------------------------------------------|-----------------------|----------------------|
| <i>trans</i> -[Ni <sup>III</sup> (L <sup>ox</sup> )Cl <sub>2</sub> ] <sup>1+</sup><br>S = 1/2 | 0 Ni : 0.676564       | 0 Ni : 0.687353      |
|                                                                                               | 1 N : -0.005689       | 1 N : -0.004695      |
|                                                                                               | 2 C : -0.001614       | 2 C : -0.001711      |
|                                                                                               | 3 C : 0.000136        | 3 C : -0.000184      |
|                                                                                               | 4 C : -0.003052       | 4 C : -0.002565      |
|                                                                                               | 5 C : 0.000283        | 5 C : -0.000086      |
|                                                                                               | 6 C : -0.001826       | 6 C : -0.001864      |
|                                                                                               | 7 C : -0.007687       | 7 C : -0.005848      |
|                                                                                               | 8 N : 0.014693        | 8 N : 0.012695       |
|                                                                                               | 9 C : -0.000524       | 9 C : -0.000512      |
|                                                                                               | 10 C : -0.000346      | 10 C : -0.000316     |
|                                                                                               | 11 C : -0.000490      | 11 C : -0.001081     |
|                                                                                               | 12 N : -0.015421      | 12 N : -0.014002     |
|                                                                                               | 13 C : -0.000042      | 13 C : -0.000954     |
|                                                                                               | 14 C : -0.001321      | 14 C : -0.001069     |
|                                                                                               | 15 C : -0.000385      | 15 C : -0.000409     |
|                                                                                               | 16 N : 0.019275       | 16 N : 0.016788      |
|                                                                                               | 17 C : -0.008664      | 17 C : -0.006551     |
|                                                                                               | 18 Cl : 0.165043      | 18 Cl : 0.159656     |
|                                                                                               | 19 Cl : 0.175990      | 19 Cl : 0.169319     |
|                                                                                               | 20 C : 0.001481       | 20 C : 0.001106      |
|                                                                                               | 21 C : 0.001279       | 21 C : 0.000931      |
|                                                                                               | 22 H : -0.000195      | 22 H : -0.000169     |
|                                                                                               | 23 H : 0.000227       | 23 H : 0.000141      |
|                                                                                               | 24 H : -0.000191      | 24 H : -0.000165     |
|                                                                                               | 25 H : -0.000577      | 25 H : -0.000426     |
|                                                                                               | 26 H : 0.000116       | 26 H : 0.000089      |
|                                                                                               | 27 H : -0.000017      | 27 H : 0.000021      |
|                                                                                               | 28 H : -0.000201      | 28 H : -0.000123     |
|                                                                                               | 29 H : -0.000142      | 29 H : -0.000105     |
|                                                                                               | 30 H : -0.002374      | 30 H : -0.001829     |
|                                                                                               | 31 H : -0.000043      | 31 H : -0.000018     |
|                                                                                               | 32 H : -0.000051      | 32 H : -0.000019     |
|                                                                                               | 33 H : 0.000028       | 33 H : 0.000039      |
|                                                                                               | 34 H : 0.000422       | 34 H : 0.000362      |
|                                                                                               | 35 H : -0.000580      | 35 H : -0.000436     |
|                                                                                               | 36 H : -0.000057      | 36 H : -0.000080     |
|                                                                                               | 37 H : -0.002355      | 37 H : -0.001768     |
|                                                                                               | 38 H : -0.000470      | 38 H : -0.000414     |
|                                                                                               | 39 H : -0.000067      | 39 H : -0.000045     |
|                                                                                               | 40 H : -0.000326      | 40 H : -0.000304     |
|                                                                                               | 41 H : -0.000387      | 41 H : -0.000321     |
|                                                                                               | 42 H : 0.000048       | 42 H : 0.000003      |
|                                                                                               | 43 H : -0.000490      | 43 H : -0.000433     |

| Compound                                                                                      | Mulliken Spin density | Loewdin Spin density |
|-----------------------------------------------------------------------------------------------|-----------------------|----------------------|
| $[\text{Ni}^{\text{I}}(\text{L}^{\bullet})\text{-}\{\text{P}(\text{OCH}_3)_3\}]^0$<br>$S = 1$ | 0 Ni : 0.887174       | 0 Ni : 0.861255      |
|                                                                                               | 1 N : -0.142866       | 1 N : -0.124762      |
|                                                                                               | 2 C : -0.139803       | 2 C : -0.126147      |
|                                                                                               | 3 C : -0.038091       | 3 C : -0.038978      |
|                                                                                               | 4 C : -0.030543       | 4 C : -0.041143      |
|                                                                                               | 5 C : -0.209085       | 5 C : -0.168942      |
|                                                                                               | 6 C : 0.076054        | 6 C : 0.034079       |
|                                                                                               | 7 C : -0.045650       | 7 C : -0.033915      |
|                                                                                               | 8 N : 0.061547        | 8 N : 0.059254       |
|                                                                                               | 9 C : -0.003442       | 9 C : -0.001363      |
|                                                                                               | 10 C : 0.001874       | 10 C : 0.001673      |
|                                                                                               | 11 C : -0.002091      | 11 C : -0.001713     |
|                                                                                               | 12 N : 0.019821       | 12 N : 0.021652      |
|                                                                                               | 13 C : 0.000087       | 13 C : -0.001198     |
|                                                                                               | 14 C : -0.011135      | 14 C : -0.011455     |
|                                                                                               | 15 C : 0.024459       | 15 C : 0.006594      |
|                                                                                               | 16 N : -0.277201      | 16 N : -0.252156     |
|                                                                                               | 17 C : -0.131696      | 17 C : -0.136803     |
|                                                                                               | 18 P : -0.058010      | 18 P : -0.038314     |
|                                                                                               | 19 O : 0.002145       | 19 O : -0.002795     |
|                                                                                               | 20 O : 0.001198       | 20 O : -0.004214     |
|                                                                                               | 21 O : -0.000112      | 21 O : -0.002796     |
|                                                                                               | 22 C : 0.000722       | 22 C : -0.000997     |
|                                                                                               | 23 C : -0.002631      | 23 C : -0.001947     |
|                                                                                               | 24 C : -0.002083      | 24 C : -0.001695     |
|                                                                                               | 25 H : 0.003844       | 25 H : 0.002298      |
|                                                                                               | 26 H : 0.002877       | 26 H : 0.001357      |
|                                                                                               | 27 H : 0.013071       | 27 H : 0.006463      |
|                                                                                               | 28 H : 0.005623       | 28 H : 0.003340      |
|                                                                                               | 29 H : 0.001779       | 29 H : 0.001298      |
|                                                                                               | 30 H : 0.003533       | 30 H : 0.002198      |
|                                                                                               | 31 H : -0.000006      | 31 H : -0.000041     |
|                                                                                               | 32 H : 0.000056       | 32 H : -0.000055     |
|                                                                                               | 33 H : 0.001563       | 33 H : 0.001317      |
|                                                                                               | 34 H : 0.000248       | 34 H : 0.000137      |
|                                                                                               | 35 H : -0.000978      | 35 H : -0.000698     |
|                                                                                               | 36 H : 0.000586       | 36 H : 0.000309      |
|                                                                                               | 37 H : -0.001115      | 37 H : -0.000369     |
|                                                                                               | 38 H : 0.000474       | 38 H : 0.000312      |
|                                                                                               | 39 H : -0.003350      | 39 H : -0.002055     |
|                                                                                               | 40 H : -0.024143      | 40 H : -0.017494     |
|                                                                                               | 41 H : 0.004855       | 41 H : 0.002815      |
|                                                                                               | 42 H : 0.013402       | 42 H : 0.007126      |
|                                                                                               | 43 H : 0.000070       | 43 H : 0.000004      |
|                                                                                               | 44 H : 0.000055       | 44 H : 0.000023      |
|                                                                                               | 45 H : -0.003017      | 45 H : -0.001345     |
|                                                                                               | 46 H : -0.000059      | 46 H : -0.000066     |
|                                                                                               | 47 H : -0.000006      | 47 H : -0.000004     |
|                                                                                               | 48 H : -0.000022      | 48 H : -0.000035     |
|                                                                                               | 49 H : 0.000043       | 49 H : 0.000038      |
|                                                                                               | 50 H : 0.000059       | 50 H : 0.000009      |
| 51 H : -0.000081                                                                              | 51 H : -0.000055      |                      |

| Compound                                                                                           | Mulliken Spin density | Loewdin Spin density |
|----------------------------------------------------------------------------------------------------|-----------------------|----------------------|
| [Ni <sup>I</sup> (L <sup>•</sup> )-<br>{P(OCH <sub>3</sub> ) <sub>3</sub> }] <sup>0</sup><br>S = 0 | 0 Ni : 0.886764       | 0 Ni : 0.860823      |
|                                                                                                    | 1 N : -0.143481       | 1 N : -0.125293      |
|                                                                                                    | 2 C : -0.139847       | 2 C : -0.126143      |
|                                                                                                    | 3 C : -0.037290       | 3 C : -0.038375      |
|                                                                                                    | 4 C : -0.031134       | 4 C : -0.041533      |
|                                                                                                    | 5 C : -0.208355       | 5 C : -0.168398      |
|                                                                                                    | 6 C : 0.075963        | 6 C : 0.034040       |
|                                                                                                    | 7 C : 0.045548        | 7 C : -0.033830      |
|                                                                                                    | 8 N : 0.061488        | 8 N : 0.059206       |
|                                                                                                    | 9 C : -0.003437       | 9 C : -0.001360      |
|                                                                                                    | 10 C : 0.001874       | 10 C : 0.001671      |
|                                                                                                    | 11 C : -0.002089      | 11 C : -0.001713     |
|                                                                                                    | 12 N : 0.019784       | 12 N : 0.021611      |
|                                                                                                    | 13 C : 0.000086       | 13 C : -0.001196     |
|                                                                                                    | 14 C : -0.011129      | 14 C : -0.011452     |
|                                                                                                    | 15 C : 0.024434       | 15 C : 0.006584      |
|                                                                                                    | 16 N : -0.276973      | 16 N : -0.251936     |
|                                                                                                    | 17 C : -0.131564      | 17 C : -0.136678     |
|                                                                                                    | 18 P : -0.058087      | 18 P : -0.038367     |
|                                                                                                    | 19 O : 0.002145       | 19 O : -0.002801     |
|                                                                                                    | 20 O : 0.001197       | 20 O : -0.004223     |
|                                                                                                    | 21 O : -0.000120      | 21 O : -0.002808     |
|                                                                                                    | 22 C : 0.000724       | 22 C : -0.000996     |
|                                                                                                    | 23 C : -0.002637      | 23 C : -0.001952     |
|                                                                                                    | 24 C : -0.002090      | 24 C : -0.001700     |
|                                                                                                    | 25 H : 0.003803       | 25 H : 0.002279      |
|                                                                                                    | 26 H : 0.002906       | 26 H : 0.001370      |
|                                                                                                    | 27 H : 0.013036       | 27 H : 0.006446      |
|                                                                                                    | 28 H : 0.005620       | 28 H : 0.003338      |
|                                                                                                    | 29 H : 0.001773       | 29 H : 0.001295      |
|                                                                                                    | 30 H : 0.003532       | 30 H : 0.002197      |
|                                                                                                    | 31 H : -0.000007      | 31 H : -0.000041     |
|                                                                                                    | 32 H : 0.000056       | 32 H : -0.000054     |
|                                                                                                    | 33 H : 0.001561       | 33 H : 0.001315      |
|                                                                                                    | 34 H : 0.000244       | 34 H : 0.000135      |
|                                                                                                    | 35 H : -0.000979      | 35 H : -0.000698     |
|                                                                                                    | 36 H : 0.000586       | 36 H : 0.000309      |
|                                                                                                    | 37 H : -0.001116      | 37 H : -0.000370     |
|                                                                                                    | 38 H : 0.000474       | 38 H : 0.000312      |
|                                                                                                    | 39 H : -0.003348      | 39 H : -0.002054     |
|                                                                                                    | 40 H : -0.024118      | 40 H : -0.017474     |
|                                                                                                    | 41 H : 0.004854       | 41 H : 0.002815      |
|                                                                                                    | 42 H : 0.013395       | 42 H : 0.007122      |
|                                                                                                    | 43 H : 0.000070       | 43 H : 0.000004      |
|                                                                                                    | 44 H : 0.000055       | 44 H : 0.000023      |
|                                                                                                    | 45 H : -0.003012      | 45 H : -0.001342     |
|                                                                                                    | 46 H : -0.000060      | 46 H : -0.000066     |
|                                                                                                    | 47 H : -0.000006      | 47 H : -0.000004     |
|                                                                                                    | 48 H : -0.000022      | 48 H : -0.000035     |
|                                                                                                    | 49 H : 0.000043       | 49 H : 0.000039      |
|                                                                                                    | 50 H : 0.000060       | 50 H : 0.000009      |
| 51 H : -0.000081                                                                                   | 51 H : -0.000055      |                      |



| Compound                                                                                             | Mulliken Spin density | Loewdin Spin density |
|------------------------------------------------------------------------------------------------------|-----------------------|----------------------|
| $[\text{Ni}^{\text{I}}(\text{L}^{\text{ox}})-\{\text{P}(\text{OCH}_3)_3\}]^{\text{I}+}$<br>$S = 1/2$ | 0 Ni : 1.137076       | 0 Ni : 1.124955      |
|                                                                                                      | 1 N : -0.016316       | 1 N : -0.008605      |
|                                                                                                      | 2 C : -0.059283       | 2 C : -0.048569      |
|                                                                                                      | 3 C : 0.041160        | 3 C : 0.024367       |
|                                                                                                      | 4 C : -0.090341       | 4 C : -0.071112      |
|                                                                                                      | 5 C : 0.041060        | 5 C : 0.024300       |
|                                                                                                      | 6 C : -0.059579       | 6 C : -0.048558      |
|                                                                                                      | 7 C : -0.050662       | 7 C : -0.047792      |
|                                                                                                      | 8 N : 0.018935        | 8 N : 0.021975       |
|                                                                                                      | 9 C : 0.000158        | 9 C : -0.000457      |
|                                                                                                      | 10 C : -0.000221      | 10 C : -0.000294     |
|                                                                                                      | 11 C : -0.002989      | 11 C : -0.002005     |
|                                                                                                      | 12 N : 0.044211       | 12 N : 0.041083      |
|                                                                                                      | 13 C : -0.002898      | 13 C : -0.001933     |
|                                                                                                      | 14 C : -0.000308      | 14 C : -0.000365     |
|                                                                                                      | 15 C : 0.000207       | 15 C : -0.000490     |
|                                                                                                      | 16 N : 0.017807       | 16 N : 0.021271      |
|                                                                                                      | 17 C : -0.051564      | 17 C : -0.048509     |
|                                                                                                      | 18 P : -0.002570      | 18 P : -0.001695     |
|                                                                                                      | 19 O : 0.001617       | 19 O : 0.000703      |
|                                                                                                      | 20 O : 0.000788       | 20 O : 0.000422      |
|                                                                                                      | 21 O : 0.004589       | 21 O : 0.003773      |
|                                                                                                      | 22 C : -0.000807      | 22 C : -0.000771     |
|                                                                                                      | 23 C : 0.001335       | 23 C : 0.001027      |
|                                                                                                      | 24 C : 0.001027       | 24 C : 0.000742      |
|                                                                                                      | 25 H : -0.000417      | 25 H : 0.000081      |
|                                                                                                      | 26 H : 0.004598       | 26 H : 0.002248      |
|                                                                                                      | 27 H : -0.000414      | 27 H : 0.000082      |
|                                                                                                      | 28 H : 0.006726       | 28 H : 0.004056      |
|                                                                                                      | 29 H : -0.001083      | 29 H : -0.000956     |
|                                                                                                      | 30 H : 0.004038       | 30 H : 0.002615      |
|                                                                                                      | 31 H : 0.000127       | 31 H : -0.000007     |
|                                                                                                      | 32 H : -0.000485      | 32 H : -0.000411     |
|                                                                                                      | 33 H : 0.002418       | 33 H : 0.002066      |
|                                                                                                      | 34 H : 0.001022       | 34 H : 0.000600      |
|                                                                                                      | 35 H : -0.002073      | 35 H : -0.001566     |
|                                                                                                      | 36 H : 0.002477       | 36 H : 0.002108      |
|                                                                                                      | 37 H : 0.000922       | 37 H : 0.000598      |
|                                                                                                      | 38 H : 0.000131       | 38 H : -0.000005     |
|                                                                                                      | 39 H : -0.000497      | 39 H : -0.000421     |
|                                                                                                      | 40 H : -0.000953      | 40 H : -0.000897     |
|                                                                                                      | 41 H : 0.004014       | 41 H : 0.002605      |
|                                                                                                      | 42 H : 0.006755       | 42 H : 0.004066      |
|                                                                                                      | 43 H : -0.000045      | 43 H : -0.000019     |
|                                                                                                      | 44 H : 0.000114       | 44 H : 0.000030      |
|                                                                                                      | 45 H : 0.000592       | 45 H : -0.000034     |
|                                                                                                      | 46 H : 0.000052       | 46 H : 0.000030      |
|                                                                                                      | 47 H : -0.000153      | 47 H : -0.000104     |
|                                                                                                      | 48 H : -0.000156      | 48 H : -0.000119     |
|                                                                                                      | 49 H : -0.000071      | 49 H : -0.000048     |
|                                                                                                      | 50 H : -0.000064      | 50 H : -0.000051     |
| 51 H : -0.000005                                                                                     | 51 H : -0.000011      |                      |

| Compound                                                                    | Mulliken Spin density | Loewdin Spin density |
|-----------------------------------------------------------------------------|-----------------------|----------------------|
| $[\text{Ni}^{\text{I}}(\text{L}^{\text{ox}})(\text{CO})]^{1+}$<br>$S = 1/2$ | 0 Ni : 0.995660       | 0 Ni : 0.986505      |
|                                                                             | 1 N : 0.029822        | 1 N : 0.030511       |
|                                                                             | 2 C : -0.019231       | 2 C : -0.015770      |
|                                                                             | 3 C : 0.011715        | 3 C : 0.006952       |
|                                                                             | 4 C : -0.029931       | 4 C : -0.023873      |
|                                                                             | 5 C : 0.011729        | 5 C : 0.006966       |
|                                                                             | 6 C : -0.019271       | 6 C : -0.015793      |
|                                                                             | 7 C : -0.025482       | 7 C : -0.021836      |
|                                                                             | 8 N : 0.050658        | 8 N : 0.050271       |
|                                                                             | 9 C : -0.001939       | 9 C : -0.001030      |
|                                                                             | 10 C : 0.000871       | 10 C : 0.000561      |
|                                                                             | 11 C : -0.002515      | 11 C : -0.001789     |
|                                                                             | 12 N : 0.037493       | 12 N : 0.036681      |
|                                                                             | 13 C : -0.002523      | 13 C : -0.001804     |
|                                                                             | 14 C : 0.000893       | 14 C : 0.000574      |
|                                                                             | 15 C : -0.001930      | 15 C : -0.001037     |
|                                                                             | 16 N : 0.050694       | 16 N : 0.050419      |
|                                                                             | 17 C : -0.025238      | 17 C : -0.021634     |
|                                                                             | 18 C : -0.050803      | 18 C : -0.048661     |
|                                                                             | 19 O : -0.035248      | 19 O : -0.033279     |
|                                                                             | 20 H : 0.000559       | 20 H : 0.000509      |
|                                                                             | 21 H : 0.001522       | 21 H : 0.000750      |
|                                                                             | 22 H : 0.000554       | 22 H : 0.000506      |
|                                                                             | 23 H : 0.005162       | 23 H : 0.003323      |
|                                                                             | 24 H : 0.000314       | 24 H : 0.000223      |
|                                                                             | 25 H : 0.003888       | 25 H : 0.002578      |
|                                                                             | 26 H : -0.000045      | 26 H : -0.000045     |
|                                                                             | 27 H : -0.000181      | 27 H : -0.000180     |
|                                                                             | 28 H : 0.002353       | 28 H : 0.001954      |
|                                                                             | 29 H : 0.000163       | 29 H : 0.000297      |
|                                                                             | 30 H : -0.001310      | 30 H : -0.000969     |
|                                                                             | 31 H : 0.002350       | 31 H : 0.001954      |
|                                                                             | 32 H : 0.000150       | 32 H : 0.000293      |
|                                                                             | 33 H : -0.000047      | 33 H : -0.000046     |
|                                                                             | 34 H : -0.000181      | 34 H : -0.000180     |
|                                                                             | 35 H : 0.000294       | 35 H : 0.000205      |
|                                                                             | 36 H : 0.003870       | 36 H : 0.002570      |
| 37 H : 0.005159                                                             | 37 H : 0.003324       |                      |

| Compound                                                      | Mulliken Spin density | Loewdin Spin density |
|---------------------------------------------------------------|-----------------------|----------------------|
| [Ni <sup>I</sup> (L <sup>•</sup> )(CO)] <sup>0</sup><br>S = 1 | 0 Ni : 1.065863       | 0 Ni : 1.043537      |
|                                                               | 1 N : 0.086217        | 1 N : 0.112886       |
|                                                               | 2 C : 0.105541        | 2 C : 0.105903       |
|                                                               | 3 C : 0.091507        | 3 C : 0.068619       |
|                                                               | 4 C : 0.011460        | 4 C : 0.041319       |
|                                                               | 5 C : 0.168388        | 5 C : 0.138803       |
|                                                               | 6 C : 0.007148        | 6 C : 0.011806       |
|                                                               | 7 C : 0.010609        | 7 C : 0.012801       |
|                                                               | 8 N : 0.019443        | 8 N : 0.027383       |
|                                                               | 9 C : 0.010291        | 9 C : 0.005848       |
|                                                               | 10 C : -0.000396      | 10 C : 0.000573      |
|                                                               | 11 C : 0.001093       | 11 C : 0.000820      |
|                                                               | 12 N : 0.022133       | 12 N : 0.032549      |
|                                                               | 13 C : -0.002144      | 13 C : 0.001335      |
|                                                               | 14 C : 0.006989       | 14 C : 0.010845      |
|                                                               | 15 C : 0.012417       | 15 C : 0.011894      |
|                                                               | 16 N : 0.205663       | 16 N : 0.210573      |
|                                                               | 17 C : 0.191899       | 17 C : 0.188922      |
|                                                               | 18 C : -0.043691      | 18 C : -0.042570     |
|                                                               | 19 O : -0.041372      | 19 O : -0.029887     |
|                                                               | 20 H : -0.000511      | 20 H : 0.000206      |
|                                                               | 21 H : 0.008593       | 21 H : 0.004031      |
|                                                               | 22 H : -0.000893      | 22 H : -0.000009     |
|                                                               | 23 H : 0.011318       | 23 H : 0.006212      |
|                                                               | 24 H : -0.001106      | 24 H : -0.000347     |
|                                                               | 25 H : 0.004969       | 25 H : 0.003198      |
|                                                               | 26 H : 0.000561       | 26 H : 0.000344      |
|                                                               | 27 H : 0.000053       | 27 H : 0.000114      |
|                                                               | 28 H : 0.001628       | 28 H : 0.001662      |
|                                                               | 29 H : 0.000900       | 29 H : 0.000688      |
|                                                               | 30 H : 0.004696       | 30 H : 0.002010      |
|                                                               | 31 H : 0.001712       | 31 H : 0.001937      |
|                                                               | 32 H : 0.003697       | 32 H : 0.002035      |
|                                                               | 33 H : 0.000762       | 33 H : 0.000592      |
|                                                               | 34 H : 0.005500       | 34 H : 0.003310      |
|                                                               | 35 H : 0.013034       | 35 H : 0.010764      |
|                                                               | 36 H : 0.004826       | 36 H : 0.003166      |
| 37 H : 0.011206                                               | 37 H : 0.006127       |                      |

| Compound                                                      | Mulliken Spin density | Loewdin Spin density |
|---------------------------------------------------------------|-----------------------|----------------------|
| [Ni <sup>I</sup> (L <sup>•</sup> )(CO)] <sup>0</sup><br>S = 0 | 0 Ni : 0.898541       | 0 Ni : 0.862778      |
|                                                               | 1 N : -0.265554       | 1 N : -0.227051      |
|                                                               | 2 C : -0.054529       | 2 C : -0.057849      |
|                                                               | 3 C : 0.063642        | 3 C : 0.037435       |
|                                                               | 4 C : -0.160287       | 4 C : -0.125949      |
|                                                               | 5 C : 0.066287        | 5 C : 0.039448       |
|                                                               | 6 C : -0.058194       | 6 C : -0.060674      |
|                                                               | 7 C : -0.105936       | 7 C : -0.097895      |
|                                                               | 8 N : -0.091978       | 8 N : -0.079919      |
|                                                               | 9 C : 0.008906        | 9 C : 0.002216       |
|                                                               | 10 C : -0.004722      | 10 C : -0.005462     |
|                                                               | 11 C : 0.000542       | 11 C : -0.001447     |
|                                                               | 12 N : 0.000065       | 12 N : -0.001150     |
|                                                               | 13 C : 0.000482       | 13 C : -0.001467     |
|                                                               | 14 C : -0.004425      | 14 C : -0.005174     |
|                                                               | 15 C : 0.008501       | 15 C : 0.002095      |
|                                                               | 16 N : -0.086621      | 16 N : -0.074930     |
|                                                               | 17 C : -0.103837      | 17 C : -0.095614     |
|                                                               | 18 C : -0.083967      | 18 C : -0.073218     |
|                                                               | 19 O : -0.039294      | 19 O : -0.040633     |
|                                                               | 20 H : -0.000816      | 20 H : -0.000008     |
|                                                               | 21 H : 0.008559       | 21 H : 0.003996      |
|                                                               | 22 H : -0.000969      | 22 H : -0.000079     |
|                                                               | 23 H : 0.010830       | 23 H : 0.005890      |
|                                                               | 24 H : -0.007945      | 24 H : -0.005641     |
|                                                               | 25 H : 0.004784       | 25 H : 0.003082      |
|                                                               | 26 H : 0.000474       | 26 H : 0.000173      |
|                                                               | 27 H : -0.001952      | 27 H : -0.001226     |
|                                                               | 28 H : 0.000066       | 28 H : -0.000165     |
|                                                               | 29 H : -0.003010      | 29 H : -0.001470     |
|                                                               | 30 H : -0.001051      | 30 H : -0.000890     |
|                                                               | 31 H : 0.000087       | 31 H : -0.000144     |
|                                                               | 32 H : -0.002991      | 32 H : -0.001458     |
|                                                               | 33 H : 0.000448       | 33 H : 0.000160      |
|                                                               | 34 H : -0.001881      | 34 H : -0.001186     |
|                                                               | 35 H : -0.007669      | 35 H : -0.005438     |
|                                                               | 36 H : 0.004734       | 36 H : 0.003050      |
| 37 H : 0.010679                                               | 37 H : 0.005815       |                      |

| Compound                                                    | Mulliken Spin density | Loewdin Spin density |
|-------------------------------------------------------------|-----------------------|----------------------|
| $[\text{Zn}^{\text{II}}(\text{L}^{\text{Red}})]^0$<br>S = 1 | 0 Zn: 0.080721        | 0 Zn: 0.102268       |
|                                                             | 1 N : 0.183755        | 1 N : 0.174362       |
|                                                             | 2 C : 0.118560        | 2 C : 0.120397       |
|                                                             | 3 C : 0.213957        | 3 C : 0.202640       |
|                                                             | 4 C : 0.090138        | 4 C : 0.092495       |
|                                                             | 5 C : 0.178232        | 5 C : 0.181075       |
|                                                             | 6 C : 0.101958        | 6 C : 0.108587       |
|                                                             | 7 C : 0.352661        | 7 C : 0.313024       |
|                                                             | 8 N : 0.222518        | 8 N : 0.209916       |
|                                                             | 9 C : -0.013605       | 9 C : -0.000927      |
|                                                             | 10 C : 0.002666       | 10 C : 0.002085      |
|                                                             | 11 C : 0.000172       | 11 C : 0.002104      |
|                                                             | 12 N : 0.004628       | 12 N : 0.003544      |
|                                                             | 13 C : 0.001189       | 13 C : 0.002424      |
|                                                             | 14 C : 0.002316       | 14 C : 0.002759      |
|                                                             | 15 C : 0.019763       | 15 C : 0.014903      |
|                                                             | 16 N : 0.142294       | 16 N : 0.144916      |
|                                                             | 17 C : 0.167674       | 17 C : 0.194883      |
|                                                             | 18 C : -0.030726      | 18 C : -0.005111     |
|                                                             | 19 C : 0.041033       | 19 C : 0.021424      |
|                                                             | 20 H : -0.003519      | 20 H : -0.001569     |
|                                                             | 21 H : 0.000003       | 21 H : 0.000005      |
|                                                             | 22 H : 0.003579       | 22 H : 0.001617      |
|                                                             | 23 H : 0.008677       | 23 H : 0.008321      |
|                                                             | 24 H : 0.023468       | 24 H : 0.018090      |
|                                                             | 25 H : 0.001300       | 25 H : 0.000754      |
|                                                             | 26 H : 0.000236       | 26 H : 0.000147      |
|                                                             | 27 H : 0.002305       | 27 H : 0.000963      |
|                                                             | 28 H : 0.001294       | 28 H : 0.000820      |
|                                                             | 29 H : 0.000967       | 29 H : 0.000732      |
|                                                             | 30 H : 0.002006       | 30 H : 0.000840      |
|                                                             | 31 H : 0.001345       | 31 H : 0.000861      |
|                                                             | 32 H : 0.003160       | 32 H : 0.001759      |
|                                                             | 33 H : 0.013126       | 33 H : 0.012932      |
|                                                             | 34 H : 0.004162       | 34 H : 0.006051      |
|                                                             | 35 H : 0.022424       | 35 H : 0.019791      |
|                                                             | 36 H : 0.000844       | 36 H : 0.000306      |
|                                                             | 37 H : 0.017238       | 37 H : 0.015891      |
|                                                             | 38 H : 0.010440       | 38 H : 0.013108      |
|                                                             | 39 H : 0.007344       | 39 H : 0.010299      |
|                                                             | 40 H : -0.000772      | 40 H : -0.000209     |
|                                                             | 41 H : 0.000471       | 41 H : 0.000725      |

| Compound                                                      | Mulliken Spin density | Loewdin Spin density |
|---------------------------------------------------------------|-----------------------|----------------------|
| $[\text{Zn}^{\text{II}}(\text{L}^{\text{Red}})]^0$<br>$S = 0$ | 0 Zn: -0.000000       | 0 Zn: 0.000000       |
|                                                               | 1 N : -0.000002       | 1 N : -0.000002      |
|                                                               | 2 C : -0.063208       | 2 C : -0.064181      |
|                                                               | 3 C : 0.064705        | 3 C : 0.054050       |
|                                                               | 4 C : -0.000003       | 4 C : -0.000002      |
|                                                               | 5 C : -0.064698       | 5 C : -0.054045      |
|                                                               | 6 C : 0.063203        | 6 C : 0.064178       |
|                                                               | 7 C : 0.284095        | 7 C : 0.246261       |
|                                                               | 8 N : 0.171446        | 8 N : 0.157932       |
|                                                               | 9 C : -0.014422       | 9 C : -0.003262      |
|                                                               | 10 C : 0.001954       | 10 C : 0.001405      |
|                                                               | 11 C : 0.001490       | 11 C : 0.000641      |
|                                                               | 12 N : 0.000000       | 12 N : 0.000000      |
|                                                               | 13 C : -0.001490      | 13 C : -0.000641     |
|                                                               | 14 C : -0.001954      | 14 C : -0.001405     |
|                                                               | 15 C : 0.014422       | 15 C : 0.003262      |
|                                                               | 16 N : -0.171448      | 16 N : -0.157934     |
|                                                               | 17 C : -0.284090      | 17 C : -0.246258     |
|                                                               | 18 C : -0.032323      | 18 C : -0.007467     |
|                                                               | 19 C : 0.032323       | 19 C : 0.007467      |
|                                                               | 20 H : -0.003571      | 20 H : -0.001610     |
|                                                               | 21 H : 0.000000       | 21 H : 0.000000      |
|                                                               | 22 H : 0.003571       | 22 H : 0.001609      |
|                                                               | 23 H : 0.006484       | 23 H : 0.006066      |
|                                                               | 24 H : 0.016994       | 24 H : 0.012989      |
|                                                               | 25 H : 0.000882       | 25 H : 0.000516      |
|                                                               | 26 H : -0.000031      | 26 H : -0.000015     |
|                                                               | 27 H : -0.000562      | 27 H : -0.000086     |
|                                                               | 28 H : 0.000392       | 28 H : 0.000417      |
|                                                               | 29 H : -0.000392      | 29 H : -0.000417     |
|                                                               | 30 H : 0.000561       | 30 H : 0.000086      |
|                                                               | 31 H : 0.000031       | 31 H : 0.000015      |
|                                                               | 32 H : -0.000882      | 32 H : -0.000516     |
|                                                               | 33 H : -0.016993      | 33 H : -0.012989     |
|                                                               | 34 H : -0.006484      | 34 H : -0.006066     |
|                                                               | 35 H : 0.018143       | 35 H : 0.015472      |
|                                                               | 36 H : 0.000818       | 36 H : 0.000283      |
|                                                               | 37 H : 0.014015       | 37 H : 0.012460      |
|                                                               | 38 H : -0.018145      | 38 H : -0.015474     |
|                                                               | 39 H : -0.014013      | 39 H : -0.012459     |
|                                                               | 40 H : -0.000818      | 40 H : -0.000283     |
| 41 H : 0.000000                                               | 41 H : 0.000000       |                      |
